# Supplementary material for: Switching and Combining Device-Aided Therapies in Advanced Parkinson’s Disease: A Double Centre Retrospective Study
Source: MDPI journal article supplement (doi:10.3390/brainsci12030343), 2022-03-02
Supplement: s1 [file s1]

Supplementary Table S2. Gender differences in patients that switched and combined Device Aided Therapy (DAT). The median values and range (in brackets) are presented. PD=Parkinson's disease, GI= Global Improvement.

|                       | Age at PD onset | PD duration at 1 <sup>st</sup> DAT | Age at 1 <sup>st</sup> DAT | Duration of 1 <sup>st</sup> DAT | Age at 2 <sup>nd</sup> DAT | Duration 2 <sup>nd</sup> DAT | GI after 1 <sup>st</sup> DAT | GI after 2 <sup>nd</sup> DAT |
|-----------------------|-----------------|------------------------------------|----------------------------|---------------------------------|----------------------------|------------------------------|------------------------------|------------------------------|
| Females (n=12)        | 48.5 (29-69)    | 11.5 (3-20)                        | 63 (38-72)                 | 1.75 (0.08-11)                  | 66.5 (44-76)               | 3 (0.08-8)                   | 1.5 (1-5)                    | 2 (1-4)                      |
| Males (n=18)          | 50.5 (36-66)    | 10 (6-28)                          | 60 (44-75)                 | 3 (0.5-18)                      | 67 (39-79)                 | 2.5 (0.08-9)                 | 2 (1-6)                      | 2 (1-4)                      |
| Mann-Whitney <i>U</i> | 21.5            | 18.5                               | 23                         | 17.5                            | 18.5                       | 19                           | 23.5                         | 15.5                         |
| <i>p</i> -value       | 0.746           | 0.474                              | 0.897                      | 0.398                           | 0.473                      | 0.511                        | 0.945                        | 0.249                        |

Supplementary Table S3. Differences between between different groups of patients that switched from one to another Device Aided Therapy (DAT). The median values and range (in brackets) are presented. **Significant values are written in bold.** PD=Parkinson's disease, GI= Global Improvement, CSAI=Continuous subcutaneous apomorphine infusion, LCIG=Levodopa-carbidopa intestinal gel infusion, and STN-DBS=Deep brain stimulation of the subthalamic nucleus.

|                         | Age at<br>PD onset | PD duration<br>at 1 <sup>st</sup> DAT | Age at 1 <sup>st</sup><br>DAT | Duration<br>of 1 <sup>st</sup> DAT | Age at 2 <sup>nd</sup><br>DAT | Duration of<br>2 <sup>nd</sup> DAT | GI after 1 <sup>st</sup><br>DAT | GI after 2 <sup>nd</sup><br>DAT | Widloxon Z<br><i>p</i> -value |
|-------------------------|--------------------|---------------------------------------|-------------------------------|------------------------------------|-------------------------------|------------------------------------|---------------------------------|---------------------------------|-------------------------------|
| LCIG-to-STN-DBS (n=7)   | 45 (29-50)         | 11 (9-28)                             | 59 (38-69)                    | 4 (1-11)                           | 66 (44-73)                    | 3 (2-8)                            | 3 (1-3)                         | 2 (1-3)                         | -0.55, <i>p</i> =0.581        |
| CSAI-to-STN-DBS (n=5)   | 43 (36-52)         | 8 (8-13)                              | 52 (44-65)                    | 1 (1-2)                            | 54 (39-67)                    | 2 (1-9)                            | 2 (1-2)                         | 1 (1-3)                         | -1.00, <i>p</i> =0.317        |
| CSAI-to-LCIG (n=8)      | 55 (48-66)         | 12 (7-20)                             | 70 (58-74)                    | 1.5 (0.5-5)                        | 72 (59-77)                    | 2.75 (0.5-5)                       | 2 (1-3)                         | 2 (1-3)                         | 0.00, <i>p</i> =1.000         |
| Kruskal Wallis <i>H</i> | <b>9.03</b>        | 3.14                                  | <b>8.25</b>                   | 3.26                               | <b>7.66</b>                   | 0.83                               | 0.70                            | 2.35                            | /                             |
| <i>p</i> -value         | <b>0.011</b>       | 0.110                                 | <b>0.016</b>                  | 0.196                              | <b>0.022</b>                  | 0.662                              | 0.705                           | 0.309                           | /                             |

Supplementary Table S4. Differences between patients who switched Device Aided Therapy (DAT) and patients who combined DAT. The median values and range (in brackets) are presented. **Significant values are written in bold.** PD=Parkinson's disease, GI= Global Improvement.

|                       | Age at PD onset   | PD duration at 1 <sup>st</sup> DAT | Age at 1 <sup>st</sup> DAT | Duration of 1 <sup>st</sup> DAT | Age at 2 <sup>nd</sup> DAT | Duration of 2 <sup>nd</sup> DAT | GI after 1 <sup>st</sup> DAT | GI after 2 <sup>nd</sup> DAT | Wilcoxon Z <i>p</i> -value |
|-----------------------|-------------------|------------------------------------|----------------------------|---------------------------------|----------------------------|---------------------------------|------------------------------|------------------------------|----------------------------|
| Switched (n=24)       | <b>49 (29-66)</b> | <b>10 (7-28)</b>                   | 60 (38-74)                 | <b>1.75 (0.08-18)</b>           | 66 (39-77)                 | 3 (0.08-9)                      | <b>2(1-6)</b>                | 2(1-4)                       | -0.91, p=0.327             |
| Combined (n=6)        | <b>55 (46-69)</b> | <b>7 (3-11)</b>                    | 62 (57-75)                 | <b>5 (3-10)</b>                 | 68 (64-79)                 | 3 (0.08-5)                      | <b>1 (1-1)</b>               | 1.5 (1-2)                    | -1.72, p=0.083             |
| Mann-Whitney <i>U</i> | <b>30.5</b>       | <b>29.0</b>                        | 57.5                       | <b>27.5</b>                     | 41.5                       | 67.5                            | <b>18.0</b>                  | 49.5                         | /                          |
| <i>p</i> -value       | <b>0.031</b>      | <b>0.025</b>                       | 0.452                      | <b>0.020</b>                    | 0.113                      | 0.813                           | <b>0.003</b>                 | 0.251                        | /                          |
