# Supplementary material for: Switching and Combining Device-Aided Therapies in Advanced Parkinson’s Disease: A Double Centre Retrospective Study
Source: Brain Sci. 2022 Mar 2;12(3):343. doi: 10.3390/brainsci12030343 (PMC8946829; doi:10.3390/brainsci12030343)
Supplement: Supplementary file 1 [file brainsci-12-00343-s001.zip › Suppllementary Table 1.xlsx]

## Sheet: Suppl. Table 1
	Centre	Gender	Age at PD onset	PD duration at 1st DAT	Age at 1st DAT	Duration of 1st DAT before switch/add (years)	Global improvement from CGI after 1st DAT	MDS-UPDRS-III at 1st DAT	PDQ-39 at 1st DAT	MMSE at 1st DAT	Age at switch/add to 2nd DAT	Duration 2nd DAT up to June 2021 (years)	Global improvement from CGI after 2nd DAT	MDS-UPDRS-III at 2nd DAT	PDQ-39 at 2nd DAT	MMSE at 2nd DAT	Duration 3rd DAT up to June 2021 (years) and reason for stop	Global imporvement from CGI after 3rd DAT	Current state/Outcome	Reasons of switch/add		Frequnecy of Motor causes	Frequency of Non-Motor Causes and Adverse events	Unilateral or bilateral STN-DBS
Single switch
I. LCIG to STN-DBS, N=7																				Motor	Non-motor/ Adverse events
1	UMCL	f	43	14	57	11	1	20	36	28	69	3	2	18	36	30	/	/	ongoing	Dyskinesias	Polyneuropathy, punding syndrome	1	2	/
2	UMCL	m	48	11	59	9	1	15	66	23	68	4	3	14	57	28	/	/	drop out due to infection	Dyskinesias, motor fluctuations	Sleep problems, sweating	2	2	/
3	UMCL	m	50	15	65	1	3	36	43	26	66	4	3	26	34	29	/	/	deceased	/	Weight loss, polyneuropathy	0	2	/
4	UMCL	m	45	10	55	4	3	29	88	28	59	2	1	33	83	27	/	/	ongoing	Motor fluctuations	Polyneuropathy	1	1	/
5	UMCL	m	41	28	69	4	3	24	26	23	73	3	2	27	30	26	/	/	ongoing	Freezing of gait, tremor, motor fluctuations	/	3	0	/
6	UMCL	m	50	10	60	3	3	NA	NA	NA	63	8	1	NA	NA	NA	/	/	ongoing	Dyskinesias	Weight loss	1	1	/
7	TASMC	f	29	9	38	6	1	NA	NA	NA	44	3	1	NA	NA	28	/	/	ongoing	Dyskinesias	/	1	0	/
	Median (range)		45 (29-50)	11 (9-28)	59 (38-69)	4 (1-11)	3 (1-3)	24(15-36)	43 (26-88)	26 (23-28)	66 (44-73)	3 (3-8)	2 (1-3)	26 (14-33)	36 (30-83)	28(26-30)
II. LCIG to CSAI, N=1
1	TASMC	f	47	13	60	1	5	NA	NA	NA	61	4	2	NA	NA	NA	/	/	deceased	Dyskinesias	/	1	0	/
III. CSAI to STN-DBS, N=5
1	UMCL	m	52	8	60	1	2	49	42	30	61	2	1	61	35	28	/	/	ongoing	/	Planned "bridging therapy"	0	1	/
2	UMCL	f	43	8	51	1.5	2	41	15	27	54	2	3	31	15	28	/	/	ongoing	/	Planned "bridging therapy"	0	1	/
3	UMCL	m	36	8	44	1	2	28	21	30	39	9	1	32	24	24	/	/	ongoing	/	Day time sleepiness, nausea	0	2	/
4	UMCL	f	42	10	52	1	1	NA	NA	NA	53	8	1	NA	NA	NA	/	/	ongoing	OFF related respiratory dystonia, dyskinesias	Skin nodules at injection site	2	1	/
5	TASMC	f	52	13	65	2	2	NA	NA	NA	67	1	1	NA	NA	NA	/	/	ongoing	Disabling tremor not responsive to CSAI	/	1	0	/	30
	Median (range)		43 (36-52)	8 (8-13)	52 (44-65)	1 (1-2)	2 (1-2)	41 (28-49)	21 (15-42)	30(27-30)	54 (39-67)	2 (1-9)	1 (1-3)	32(31-61)	24(15-35)	28(24-28)
IV. CSAI to LCIG, N=8
1	UMCL	f	57	14	71	1	2	41	35	30	73	2	2	31	44	30	/	/	ongoing	Motor fluctuations	Psychosis	1	1	/
2	UMCL	m	66	8	74	2	2	28	31	29	77	2	2	32	30	29	/	/	ongoing	Dyskinesias	Skin nodules at injection site	1	1	/
3	UMCL	m	48	10	58	0.5	1	19	41	30	59	1	1	12	36	30	/	/	ongoing	Freezing of gait	Visual halucinations, sleepiness, fatigue	1	2	/
4	UMCL	f	50	20	70	0.7	1	20	10	26	71	4	3	18	11	26	/	/	deceased	/	Skin nodules at site	0	1	/
5	UMCL	m	51	19	70	0.5	3	NA	NA	NA	71	0.5	1	NA	NA	NA	/	/	ongoing	/	Skin necrosis at site, subjective cognitive complains	0	2	/
6	TASMC	m	62	7	69	5	3	NA	NA	NA	74	3.5	2	NA	NA	NA	/	/	ongoing	Motor fluctuations	/	1	0	/
7	TASMC	m	58	15	73	2	2	NA	NA	NA	75	4	3	NA	NA	NA	/	/	ongoing	Motor fluctuations	/	1	0	/
8	TASMC	f	54	10	64	2	3	NA	33	NA	66	5	3	NA	NA	29.5	/	/	ongoing	Motor fluctuations, OFF dystonia, dyskinesias	/	3	0	/
	Median (range)		55 (48-66)	12 (7-20)	70 (58-74)	1.5 (0.5-5)	2 (1-3)	24 (19-41)	33 (10-41)	29.5 (26-30)	72 (71-77)	2.75 (0.5-5)	2 (1-3)	24.5(12-32)	33 (11-44)	29.5 (26-30)
V. STN-DBS to LCIG, N=1
1	TASMC	m	42	7	49	18	2	NA	NA	NA	67	1	4	NA	NA	NA	/	/	deceased	Motor fluctuations, dyskinesias	/	2	0	/
Double switch
VI. LCIG to CSAI to STN-DBS, N=1
1	UMCL	f	44	19	63	0.08	4	NA	NA	NA	63	0.08	4	NA	NA	NA	12	2	1. Dropout due to insuficient control of symptoms, 2. Dropout due to infection	Motor fluctuations, dyskinesias	Non-motor (autonomic) fluctuations	2	1	/
VII. STN-DBS to CSAI to LCIG, N=1
1	TASMC	m	52	7	59	0.5	6	NA	NA	NA	59.5	2	4	NA	NA	NA	5		1.Droput due to insuficent control of symptoms, 2. Deceased	Dystonia	Cognitive complains	1	1	Bilateral
Combined DATs
VIII. STN-DBS+LCIG, N=5
1	TASMC*	f	55	8	63	6	1	NA	NA	NA	69	4	2	NA	NA	NA	/	/	ongoing	Motor fluctuations	/	1	0	Unilateral
2	TASMC*	f	69	3	72	4	1	NA	NA	NA	76	2	1	NA	NA	NA	/	/	ongoing	Motor fluctuations, dyskinesias	/	2	0	Unilateral
3	TASMC*	m	52	6	58	9	1	NA	NA	NA	67	0.08	2	NA	NA	NA	/	/	1. Drop-out due to DDS. 2. Back to uni STN-DBS ongoing	Motor fluctuations	Dopamine dysregulation syndrome	1	1	Unilateral
4	TASMC	m	55	6	61	3	1	NA	NA	NA	64	4	1	NA	NA	NA	/	/	ongoing	Freezing of gait	/	1	0	Bilateral
5	TASMC	m	65	10	75	4	1	NA	NA	NA	79	1	2	NA	NA	NA	/	/	ongoing	Motor fluctuations	Dysphagia	1	0	Bilateral
	Median (range)		55 (52-69)	6 (3-10)	63 (58-72)	4 (3-9)	1 (1-1)				69 (64-79)	2 (0.08-4)	1.5 (1-2)
IX. STN-DBS+CSAI to STN-DBS+LCIG, N=1
1	TASMC	m	46	11	57	10	1	NA	NA	NA	67	5	1	NA	NA	NA	2		1. Poor control of symptoms, 2. Ongoing	Gait impairment, dystonia, motor fluctuations	/	3	0	Bilateral
